# Supplementary material for: Colorimetric detection of hypoxanthine in aquatic products based on the enzyme mimic of cobalt-doped carbon nitride
Source: Royal Society of Chemistry journal article supplement (doi:10.1039/d1nj03467g), 2021-01-01
Supplement: d1nj03467g1.pdf [file d1nj03467g1.pdf]

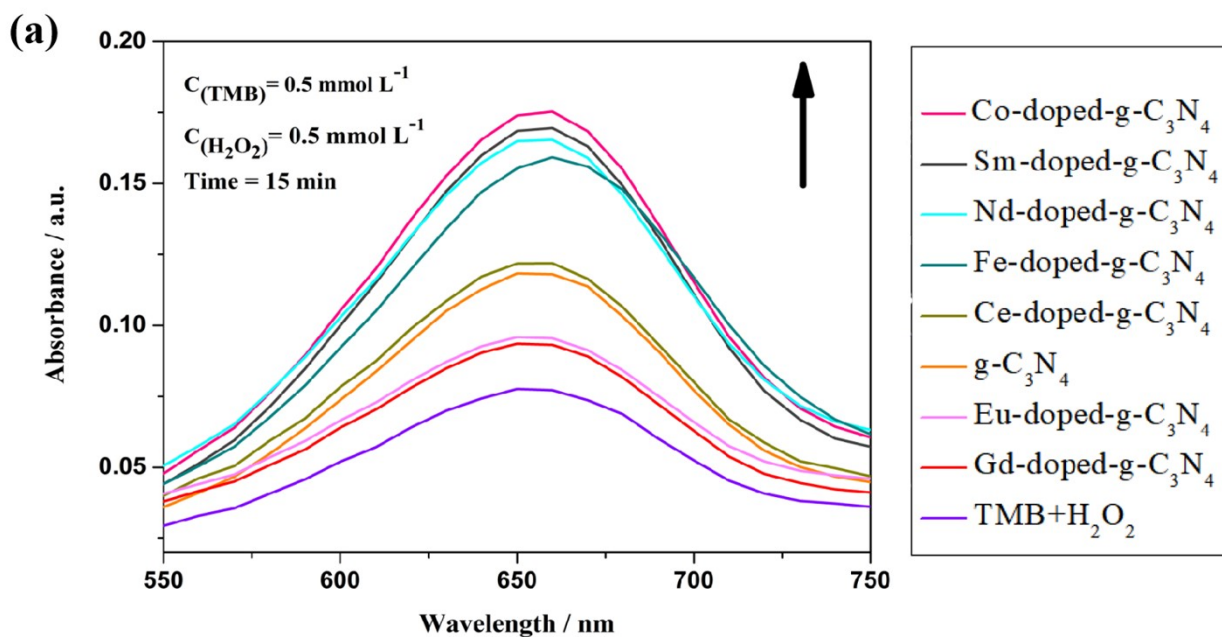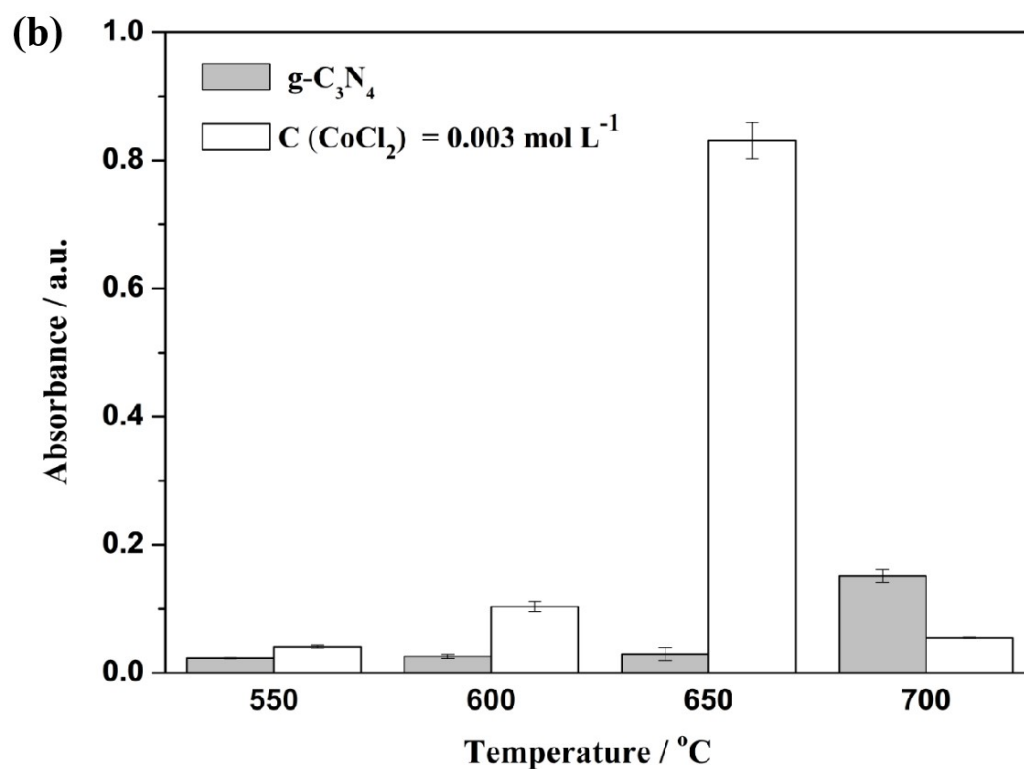

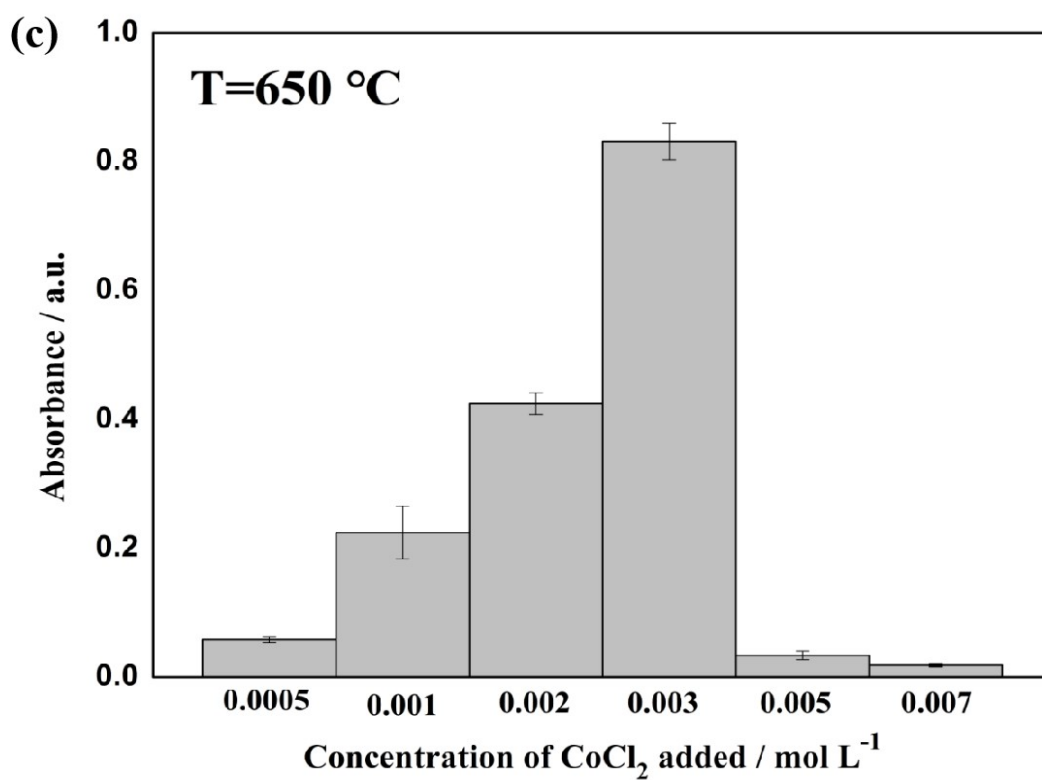

**Fig. S1** Catalytic activities of g-C<sub>3</sub>N<sub>4</sub> doped with different elements (a), calcinations temperature (b) and different doping concentrations of CoCl<sub>2</sub> (c).

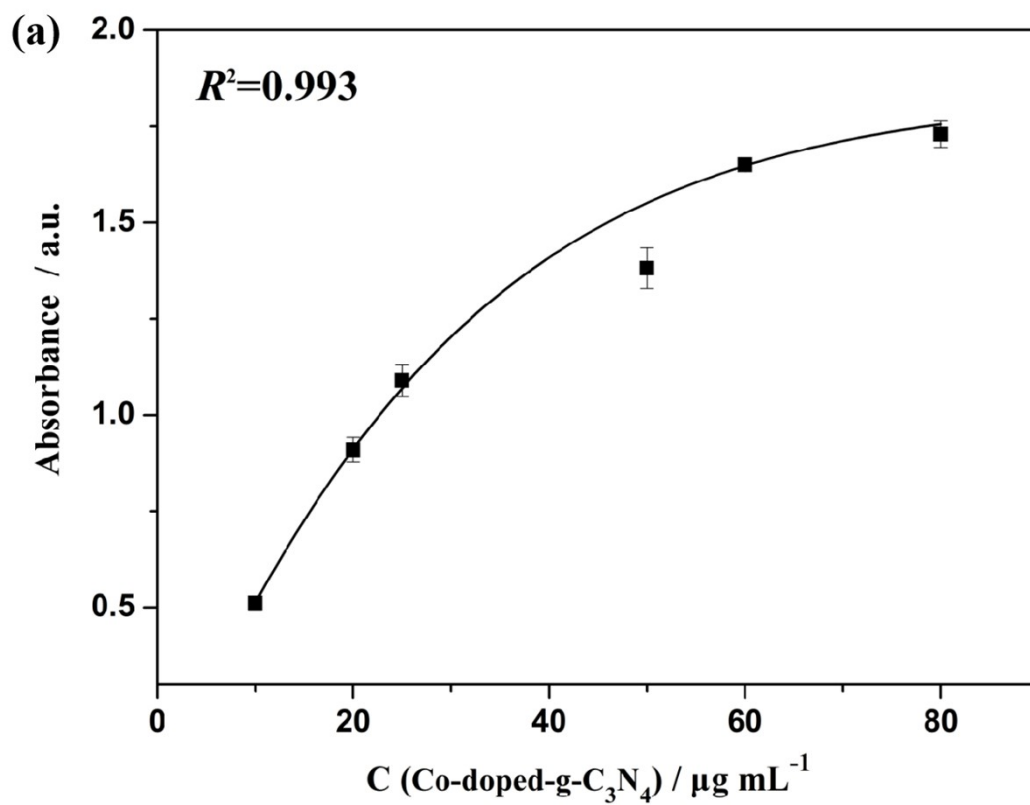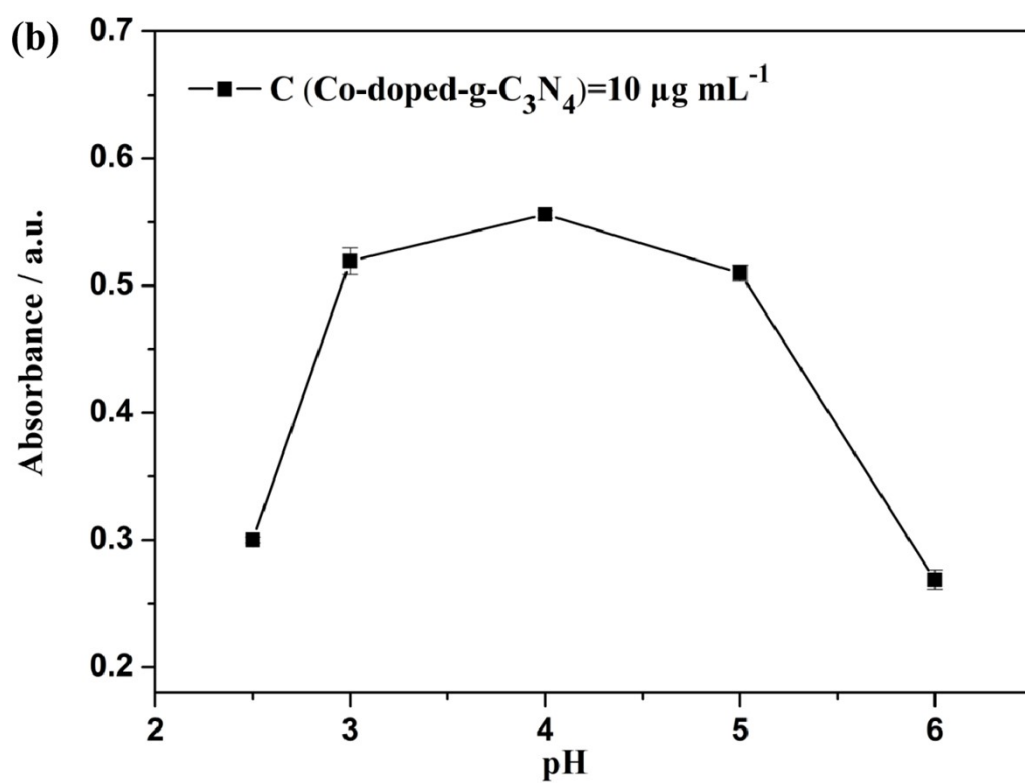

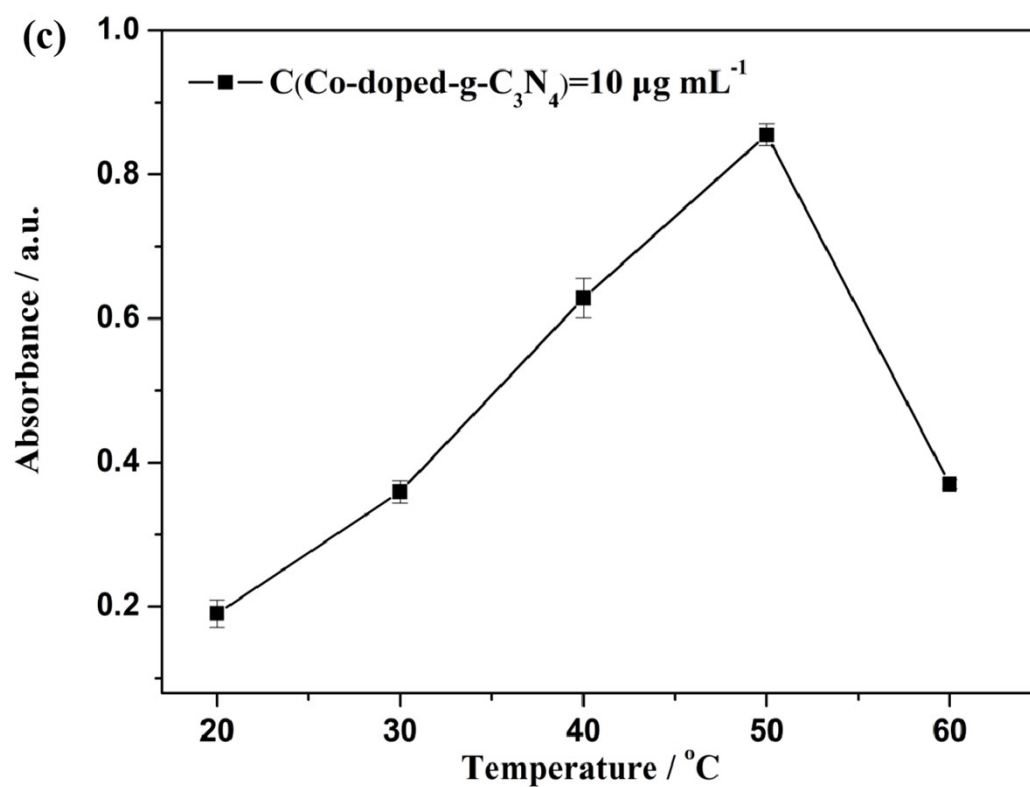

**Fig. S2** The concentrations of Co-doped-g-C<sub>3</sub>N<sub>4</sub> (a), pH values (b) and solution temperature (c) on the catalytic reaction of TMB and H<sub>2</sub>O<sub>2</sub>.

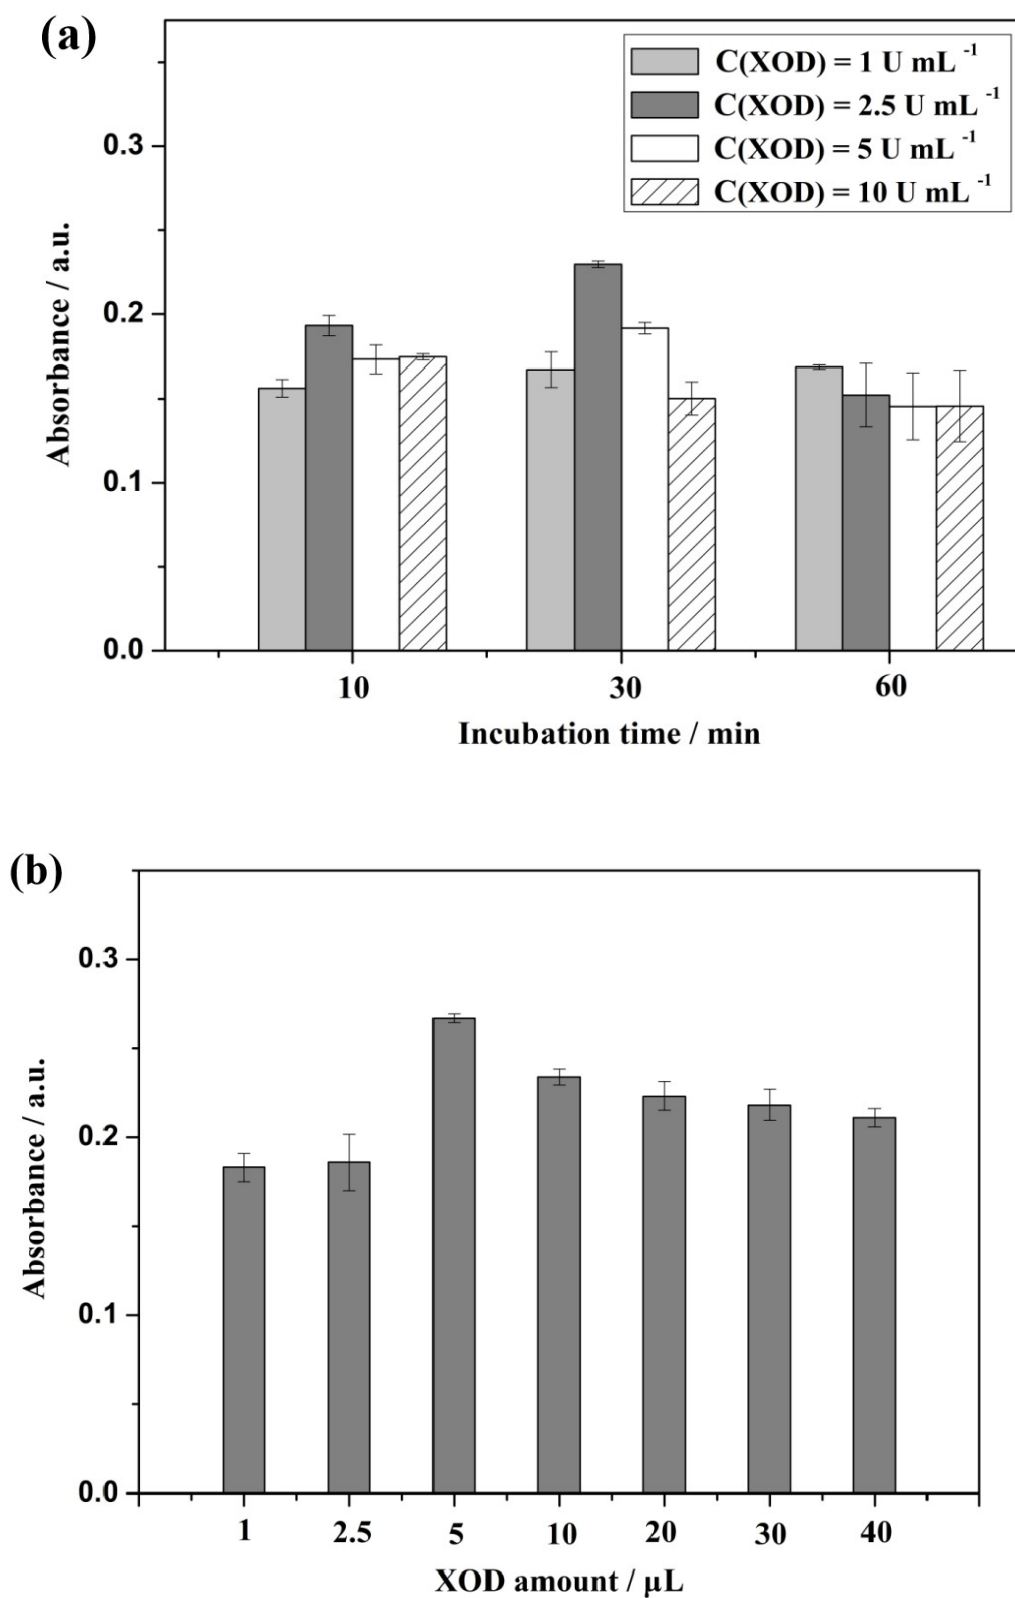

**Fig. S3** Effects of incubation time (a) and amounts (b) of xanthine oxidase (XOD) on the decomposition of Hx. (the concentrations of TMB, Co-doped-g-C<sub>3</sub>N<sub>4</sub> and Hx were 8 mmol L<sup>-1</sup>, 60 μg mL<sup>-1</sup> and 70 μmol L<sup>-1</sup>, respectively)

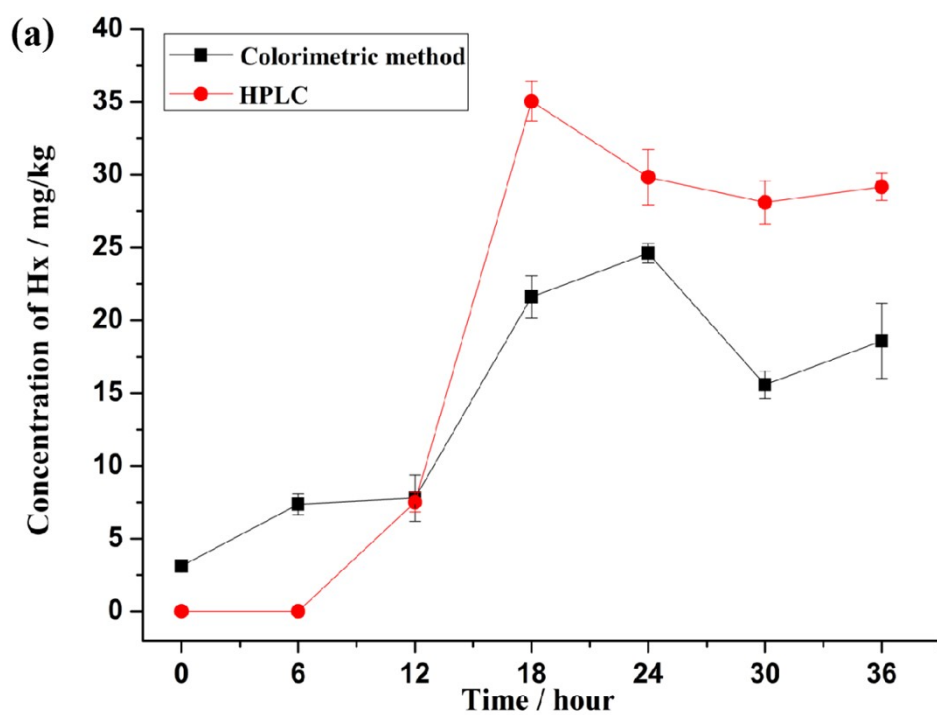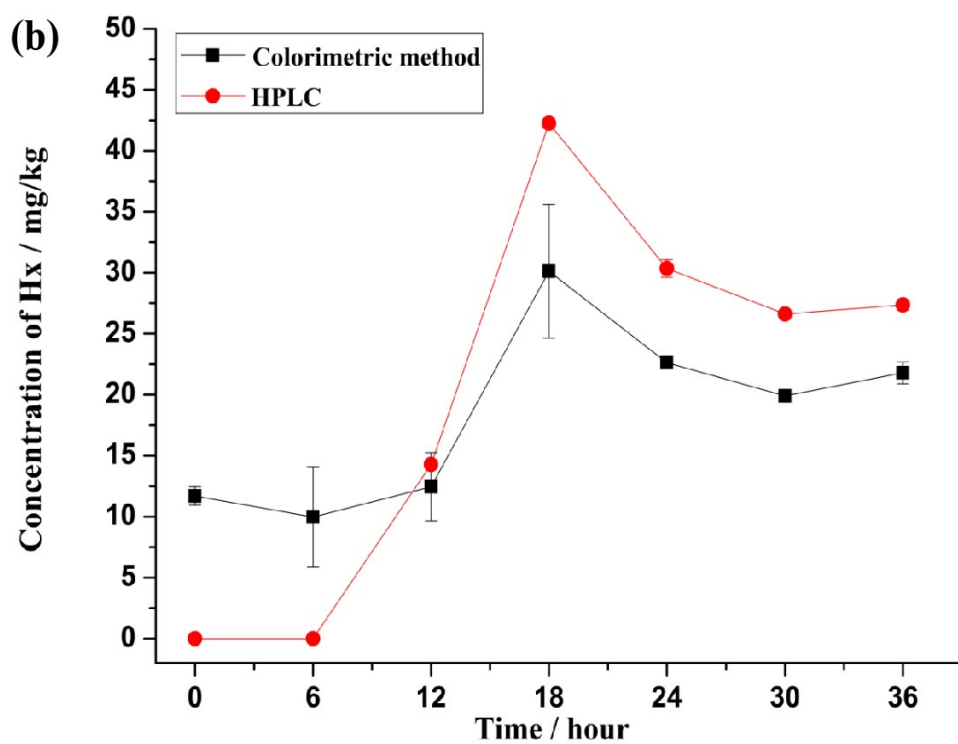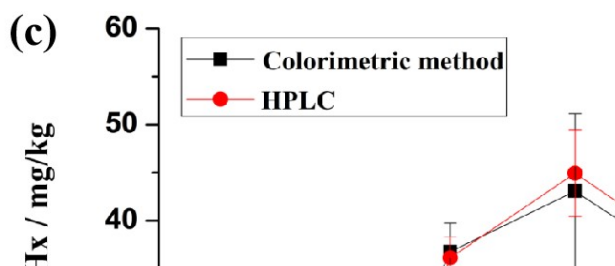

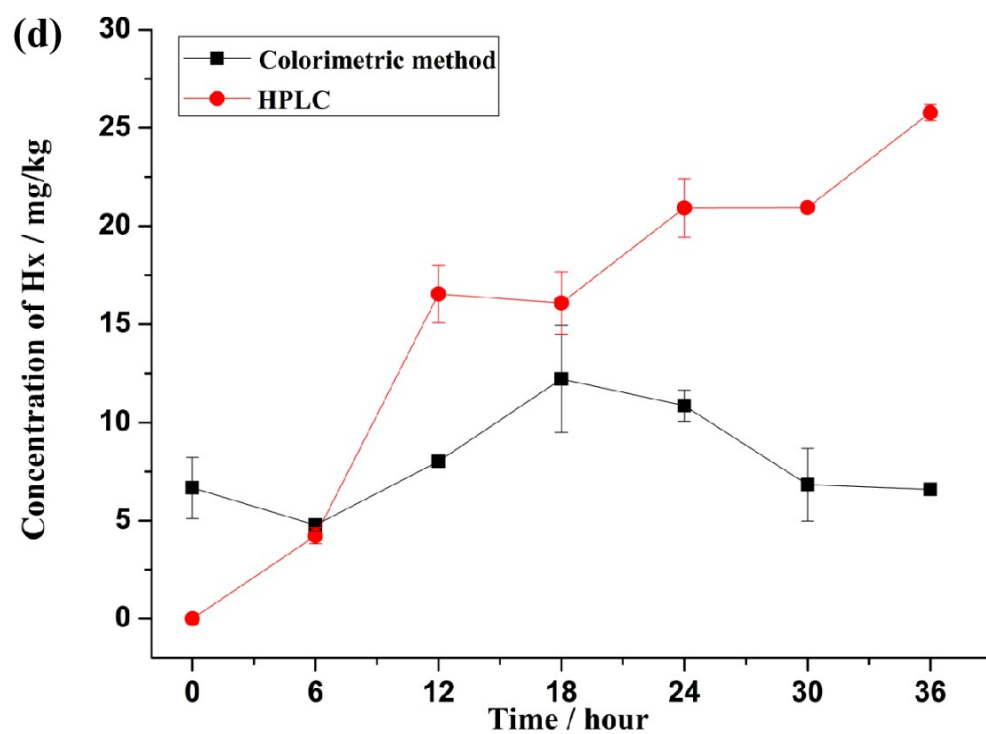

**Fig. S4** Hx content in aquatic products (grass carp (a), sea bass (b), prawn (c) and clam (d)) measured with the colorimetric method and HPLC method.
